# Supplementary material
Source: publisher figshare collection journal article supplement (https://gsapubs.figshare.com/ndownloader/files/22408617)
Supplement: Supplementary file 1 [file 22408617]

Jones, C.H., Reeg, H., Zandt, G., Gilbert, H., Owens, T.J., and Stachnik, J., 2014, P-wave tomography of potential convective downwellings and their source regions, Sierra Nevada, California: Geosphere, v. 10, doi:10.1130/GES00961.1.

Supplemental Table 4. Events recorded during SNEP deployment 2005-2007. Nass is the number of arrivals for each event included in the inversion.

| **date** | **time** | **latitude** | **longitude** | **depth** | **magnitude** | **nass** |
| --- | --- | --- | --- | --- | --- | --- |
| 6/8/05 | 4:25:14 | 62.006 | -26.541 | 10 | 4.9 | 45 |
| 6/14/05 | 17:10:17 | 51.232 | 179.406 | 51 | 6 | 93 |
| 6/21/05 | 10:43:29 | -36.155 | -100.959 | 10 | 5.8 | 68 |
| 7/6/05 | 3:47:59 | 55.593 | -35.15 | 10 | 4.8 | 41 |
| 7/7/05 | 2:17:06 | 56.068 | 164.605 | 33 | 5.5 | 58 |
| 7/10/05 | 4:46:31 | -36.31 | -97.264 | 10 | 5.7 | 81 |
| 7/10/05 | 13:10:12 | 42.389 | 19.812 | 4 | 5.5 | 52 |
| 7/11/05 | 12:01:35 | -23.818 | -111.68 | 10 | 6 | 82 |
| 7/20/05 | 21:54:06 | 43.066 | 109.017 | 6 | 5.5 | 45 |
| 7/29/05 | 5:00:30 | 52.906 | -168.647 | 50 | 5.5 | 108 |
| 8/11/05 | 9:08:47 | -22.677 | 169.509 | 10 | 5.7 | 111 |
| 8/14/05 | 2:39:40 | -19.78 | -68.98 | 114 | 5.7 | 119 |
| 8/14/05 | 2:52:00 | 16.207 | -98.139 | 19 | 5.5 | 91 |
| 8/20/05 | 10:51:23 | 70.926 | 8.984 | 10 | 4.8 | 97 |
| 8/24/05 | 17:07:46 | 10.078 | -103.548 | 10 | 5.7 | 71 |
| 8/27/05 | 18:38:21 | 6.817 | -82.432 | 10 | 5.6 | 118 |
| 9/8/05 | 5:55:42 | 21.317 | -45.805 | 10 | 5.1 | 57 |
| 9/9/05 | 7:26:44 | -4.539 | 153.474 | 90 | 6.3 | 122 |
| 9/9/05 | 11:26:07 | -31.68 | -69.136 | 113 | 5.8 | 117 |
| 9/21/05 | 2:25:08 | 43.892 | 146.145 | 103 | 6 | 122 |
| 9/23/05 | 13:48:31 | 16.131 | -87.488 | 30 | 5.9 | 111 |
| 9/25/05 | 12:55:47 | -17.515 | 167.801 | 30 | 5.7 | 111 |
| 9/26/05 | 1:55:38 | -5.678 | -76.398 | 115 | 6.7 | 148 |
| 9/29/05 | 15:50:24 | -5.437 | 151.84 | 25 | 5.9 | 143 |
| 10/5/05 | 10:07:22 | -20.535 | -174.277 | 15 | 6 | 127 |
| 10/7/05 | 17:43:02 | 13.295 | -89.347 | 50 | 5.7 | 121 |
| 10/14/05 | 18:58:09 | -18.312 | -172.434 | 1 | 5.5 | 112 |
| 10/15/05 | 10:06:17 | 46.816 | 154.113 | 43 | 6 | 125 |
| 10/22/05 | 20:34:42 | -0.858 | -90.952 | 10 | 5.5 | 80 |
| 10/23/05 | 10:08:15 | 37.377 | 134.556 | 381 | 5.7 | 129 |
| 10/28/05 | 22:30:58 | 11.07 | -62.04 | 64 | 5.5 | 86 |
| 11/2/05 | 3:09:18 | -30.39 | -178.169 | 36 | 5.8 | 128 |
| 11/7/05 | 1:49:38 | 71.689 | -12.064 | 24 | 5 | 82 |
| 11/10/05 | 19:29:54 | 57.47 | 120.586 | 6 | 5.9 | 126 |
| 11/14/05 | 21:38:51 | 38.107 | 144.896 | 11 | 6.7 | 128 |
| 11/17/05 | 19:26:56 | -22.319 | -67.887 | 163 | 6 | 150 |
| 11/20/05 | 12:53:03 | 53.843 | -164.093 | 30 | 5.7 | 123 |
| 11/21/05 | 15:36:31 | 31.019 | 129.997 | 145 | 5.9 | 113 |
| 11/23/05 | 19:33:45 | 50.073 | 147.704 | 632 | 5.6 | 123 |
| 11/24/05 | 10:46:38 | -24.273 | -176.313 | 35 | 5.8 | 122 |
| 11/28/05 | 16:41:33 | 20.288 | 146.037 | 41 | 6.1 | 125 |
| 11/30/05 | 4:54:27 | 13.953 | 146.253 | 10 | 5.5 | 121 |
| 12/5/05 | 13:16:30 | 16.614 | -46.554 | 10 | 5.1 | 101 |
| 12/11/05 | 14:20:44 | -6.568 | 152.195 | 10 | 6.2 | 123 |
| 12/12/05 | 21:01:41 | 43.206 | 139.329 | 26 | 5.7 | 122 |
| 12/13/05 | 3:16:06 | -15.265 | -178.571 | 10 | 6.1 | 125 |
| 12/14/05 | 6:45:42 | -14.596 | 167.928 | 10 | 5.6 | 97 |
| 12/17/05 | 1:14:55 | 84.141 | -1.23 | 10 | 4.9 | 76 |
| 12/20/05 | 5:51:13 | 12.232 | 140.995 | 23 | 5.8 | 112 |
| 12/21/05 | 14:32:39 | 6.623 | -82.748 | 10 | 5.9 | 114 |
| 12/22/05 | 12:20:03 | -54.719 | -135.868 | 10 | 5.6 | 79 |
| 12/23/05 | 18:03:59 | 8.065 | -38.042 | 10 | 5.3 | 104 |
| 12/23/05 | 21:47:28 | -1.386 | -77.517 | 193 | 5.8 | 116 |
| 12/26/05 | 9:09:54 | 31.616 | -40.884 | 10 | 4.8 | 50 |
| 12/26/05 | 13:48:02 | 26.822 | 140.646 | 7 | 5.8 | 97 |
| 1/3/06 | 12:27:58 | 13.841 | 145.287 | 78 | 5.9 | 93 |
| 1/6/06 | 3:39:59 | 6.635 | -82.337 | 7 | 5.9 | 111 |
| 1/6/06 | 6:28:00 | 6.956 | -34.468 | 10 | 5.4 | 58 |
| 1/7/06 | 2:23:44 | 52.415 | 173.613 | 31 | 5.7 | 87 |
| 1/10/06 | 1:09:34 | 37.057 | -14.133 | 10 | 5.5 | 97 |
| 1/11/06 | 15:13:43 | 76.209 | 6.342 | 10 | 4.9 | 81 |
| 1/18/06 | 23:43:06 | -36.411 | -100.496 | 10 | 5.8 | 82 |
| 1/20/06 | 8:53:53 | 31.066 | -41.422 | 10 | 5.5 | 108 |
| 1/20/06 | 17:51:52 | -22.399 | 173.967 | 10 | 5.5 | 104 |
| 1/23/06 | 6:03:00 | -17.423 | 167.708 | 32 | 5.8 | 117 |
| 1/23/06 | 20:50:45 | 6.864 | -77.793 | 14 | 6.1 | 109 |
| 2/5/06 | 8:17:01 | 66.297 | -142.686 | 9 | 5.5 | 42 |
| 2/10/06 | 13:22:19 | 70.881 | -14.659 | 10 | 4.6 | 69 |
| 2/13/06 | 18:08:48 | 59.506 | -30.3 | 10 | 5.3 | 67 |
| 2/14/06 | 0:39:50 | 84.253 | 0.408 | 10 | 5.3 | 91 |
| 2/14/06 | 15:27:23 | 20.821 | 146.18 | 40 | 6.2 | 123 |
| 2/17/06 | 2:13:30 | 24.021 | 141.489 | 161 | 5.6 | 116 |
| 2/18/06 | 15:59:22 | -5.193 | 152.053 | 44 | 5.9 | 108 |
| 2/20/06 | 6:56:10 | 13.164 | -87.561 | 10 | 5.6 | 120 |
| 3/2/06 | 23:35:44 | 19.358 | -63.787 | 25 | 5.5 | 74 |
| 3/7/06 | 6:28:55 | -14.805 | 167.368 | 136 | 5.7 | 95 |
| 3/27/06 | 2:50:26 | 32.602 | 132.157 | 35 | 5.7 | 105 |
| 4/7/06 | 8:30:46 | -16.537 | 176.981 | 22 | 5.9 | 134 |
| 4/16/06 | 11:48:57 | 30.242 | 138.565 | 432 | 5.7 | 111 |
| 4/17/06 | 23:49:59 | -12.491 | 166.482 | 31 | 6 | 95 |
| 4/20/06 | 17:50:40 | 34.858 | 139.207 | 23 | 5.6 | 132 |
| 4/20/06 | 23:25:02 | 60.949 | 167.089 | 22 | 6.8 | 151 |
| 4/24/06 | 15:16:35 | 81.984 | 119.001 | 10 | 5 | 71 |
| 4/24/06 | 17:01:52 | 81.932 | 118.839 | 10 | 5.3 | 113 |
| 4/28/06 | 7:22:42 | 3.924 | -31.511 | 10 | 5 | 73 |
| 4/29/06 | 16:58:06 | 60.491 | 167.516 | 11 | 6.4 | 151 |
| 4/30/06 | 0:43:11 | 44.504 | 102.385 | 10 | 5.6 | 116 |
| 4/30/06 | 19:17:17 | -27.013 | -70.959 | 27 | 6 | 149 |
| 5/1/06 | 2:24:41 | -28.458 | -176.852 | 37 | 5.7 | 111 |
| 5/1/06 | 7:48:00 | 8.165 | -82.882 | 13 | 5.6 | 129 |
| 5/1/06 | 20:13:29 | 2.205 | -99.035 | 10 | 5.7 | 110 |
| 5/4/06 | 11:25:26 | -20.579 | -174.036 | 11 | 5.7 | 142 |
| 5/6/06 | 7:09:23 | 43.597 | -32.448 | 10 | 4.5 | 71 |
| 5/10/06 | 2:42:51 | 52.515 | -169.256 | 18 | 6.1 | 145 |
| 5/16/06 | 10:39:23 | -31.779 | -179.313 | 152 | 6.8 | 147 |
| 5/16/06 | 20:55:48 | -20.751 | -174.151 | 15 | 5.8 | 141 |
| 5/18/06 | 23:04:45 | 54.627 | 163.857 | 30 | 5.7 | 143 |
| 5/21/06 | 10:58:02 | 51.51 | 16.026 | 5 | 4.8 | 81 |
| 5/24/06 | 0:32:33 | -27.565 | -112.793 | 10 | 5.6 | 97 |
| 5/25/06 | 20:48:05 | -18.141 | -71.161 | 35 | 5.5 | 147 |
| 5/28/06 | 3:12:09 | -5.724 | 151.133 | 34 | 5.9 | 150 |
| 5/28/06 | 13:23:29 | 74.083 | 13.558 | 10 | 5.1 | 109 |
| 6/2/06 | 7:31:36 | -20.837 | -178.701 | 592 | 5.5 | 144 |
| 6/11/06 | 20:01:26 | 33.129 | 131.141 | 140 | 5.9 | 153 |
| 6/14/06 | 4:18:43 | 51.752 | 177.082 | 14 | 5.9 | 150 |
| 6/15/06 | 6:49:49 | 45.389 | 97.354 | 9 | 5.7 | 140 |
| 6/16/06 | 17:10:40 | 40.349 | 143.712 | 30 | 5.6 | 118 |
| 6/16/06 | 18:29:30 | 46.605 | 144.53 | 365 | 5.4 | 110 |
| 6/18/06 | 18:28:02 | 33.028 | -39.702 | 10 | 5.5 | 122 |
| 6/22/06 | 10:53:12 | 45.417 | 149.343 | 95 | 6.1 | 153 |
| 6/27/06 | 2:07:32 | -22.762 | -68.695 | 115 | 5.5 | 151 |
| 6/27/06 | 2:59:15 | -19.865 | -178.287 | 570 | 6 | 160 |
| 6/27/06 | 13:03:12 | 14.96 | -94.18 | 29 | 5.5 | 148 |
| 6/30/06 | 2:43:35 | 73.955 | 8.821 | 10 | 4.7 | 107 |
| 6/30/06 | 8:07:40 | -6.257 | 154.799 | 60 | 5.5 | 144 |
| 7/6/06 | 15:11:37 | -10.483 | 165.117 | 67 | 5.7 | 115 |
| 7/7/06 | 7:26:13 | -15.244 | -173.61 | 35 | 5.7 | 162 |
| 7/8/06 | 20:40:01 | 51.214 | -179.312 | 22 | 6.2 | 162 |
| 7/16/06 | 11:42:41 | -28.715 | -72.543 | 10 | 5.9 | 172 |
| 7/18/06 | 16:02:17 | -20.084 | -178.434 | 587 | 5.7 | 136 |
| 7/28/06 | 8:13:24 | 59.019 | -30.834 | 10 | 4.7 | 84 |
| 7/28/06 | 9:15:03 | 59.074 | -30.585 | 10 | 4.7 | 114 |
| 7/29/06 | 19:53:43 | 23.589 | -63.923 | 10 | 5.5 | 129 |
| 7/30/06 | 7:16:57 | 72.19 | 0.834 | 10 | 5.3 | 101 |
| 8/4/06 | 7:45:48 | 52.121 | 171.035 | 10 | 5.5 | 131 |
| 8/4/06 | 13:41:40 | 9.974 | -70.649 | 15 | 5.5 | 110 |
| 8/5/06 | 14:03:44 | -33.131 | -68.707 | 22 | 5.7 | 161 |
| 8/6/06 | 18:16:40 | 26.12 | 144.008 | 23 | 6 | 115 |
| 8/7/06 | 22:18:54 | -15.777 | 167.799 | 141 | 6 | 164 |
| 8/9/06 | 8:01:29 | -6.291 | 154.615 | 107 | 5.5 | 129 |
| 8/12/06 | 18:39:18 | 28.791 | 130.012 | 28 | 5.6 | 116 |
| 8/13/06 | 19:03:07 | 71.504 | -4.355 | 0 | 5 | 60 |
| 8/14/06 | 13:09:35 | 19.022 | -64.636 | 21 | 5.5 | 154 |
| 8/17/06 | 11:11:36 | 55.617 | 161.686 | 55 | 6.1 | 175 |
| 8/17/06 | 15:20:35 | 46.54 | 141.905 | 17 | 6 | 176 |
| 8/20/06 | 3:01:02 | 49.823 | 156.415 | 26 | 5.8 | 158 |
| 8/24/06 | 21:50:37 | 51.148 | 157.522 | 43 | 5.9 | 168 |
| 8/25/06 | 0:44:46 | -24.405 | -67.028 | 184 | 5.9 | 164 |
| 8/28/06 | 14:24:08 | -10.756 | 165.057 | 17 | 5.7 | 127 |
| 9/1/06 | 10:18:52 | -6.759 | 155.512 | 38 | 6.3 | 168 |
| 9/1/06 | 12:04:22 | 53.97 | -166.392 | 76 | 5.8 | 169 |
| 9/3/06 | 22:57:31 | -24.046 | 178.817 | 568 | 5.9 | 151 |
| 9/6/06 | 5:00:28 | 61.63 | 168.638 | 10 | 5.5 | 148 |
| 9/10/06 | 14:56:08 | 26.319 | -86.606 | 14 | 5.9 | 138 |
| 9/11/06 | 12:47:18 | 46.349 | -27.531 | 10 | 4.9 | 93 |
| 9/12/06 | 13:30:56 | -28.944 | -68.898 | 114 | 5.8 | 165 |
| 9/16/06 | 2:22:51 | 41.364 | 135.697 | 367 | 5.9 | 155 |
| 9/18/06 | 3:45:59 | 51.511 | -173.965 | 5 | 5.6 | 165 |
| 9/22/06 | 2:32:26 | -26.868 | -63.149 | 598 | 6.1 | 171 |
| 9/23/06 | 7:20:04 | 70.918 | -6.257 | 18 | 4.6 | 108 |
| 9/28/06 | 1:36:48 | 46.462 | 153.36 | 11 | 5.8 | 164 |
| 9/28/06 | 6:22:10 | -16.592 | -172.033 | 28 | 6.5 | 172 |
| 9/29/06 | 13:08:26 | 10.876 | -61.756 | 53 | 5.9 | 161 |
| 9/29/06 | 18:23:06 | 10.814 | -61.758 | 52 | 5.5 | 141 |
| 9/30/06 | 12:47:23 | 7.283 | -34.658 | 10 | 5.6 | 156 |
| 9/30/06 | 16:26:56 | -15.588 | -73.159 | 107 | 5.6 | 161 |
| 9/30/06 | 17:50:23 | 46.351 | 153.166 | 11 | 6.1 | 167 |
| 10/2/06 | 14:52:10 | 36.713 | -33.258 | 10 | 4.7 | 80 |
| 10/3/06 | 18:03:15 | -18.869 | 169.003 | 171 | 5.9 | 163 |
| 10/6/06 | 16:25:28 | -50.105 | -114.598 | 10 | 5.7 | 104 |
| 10/8/06 | 13:50:24 | -23.554 | -175.271 | 10 | 5.6 | 163 |
| 10/10/06 | 23:58:04 | 37.197 | 142.663 | 10 | 5.8 | 154 |
| 10/11/06 | 6:00:48 | 8.405 | -103.165 | 10 | 5.8 | 155 |
| 10/15/06 | 17:07:49 | 19.878 | -155.935 | 39 | 6.2 | 167 |
| 10/15/06 | 17:14:12 | 20.129 | -155.983 | 19 | 5.8 | 151 |
| 10/18/06 | 21:15:49 | 4.82 | -82.652 | 20 | 5.7 | 118 |
| 10/19/06 | 9:34:51 | 42.3 | 19.8 | 6 | 5 | 67 |
| 10/20/06 | 10:48:56 | -13.457 | -76.677 | 23 | 5.9 | 162 |
| 11/5/06 | 9:59:28 | 40.201 | -29.69 | 10 | 4.8 | 111 |
| 11/7/06 | 6:06:54 | 2.038 | -32.373 | 10 | 4.9 | 99 |
| 11/7/06 | 13:25:36 | -21.729 | -68.204 | 121 | 5.5 | 158 |
| 11/12/06 | 2:00:21 | 78.725 | -138.147 | 10 | 4.6 | 87 |
| 11/13/06 | 1:26:34 | -26.041 | -63.221 | 552 | 6.3 | 168 |
| 11/14/06 | 22:22:12 | -23.267 | -68.326 | 108 | 5.5 | 163 |
| 11/16/06 | 6:20:21 | 46.358 | 154.468 | 9 | 6 | 168 |
| 11/17/06 | 6:33:49 | 47.017 | 155.526 | 10 | 5.6 | 161 |
| 11/17/06 | 18:03:12 | 28.591 | 129.895 | 22 | 5.8 | 125 |
| 11/18/06 | 10:05:44 | 11.111 | -87.81 | 30 | 5.5 | 149 |
| 11/19/06 | 18:57:34 | -4.521 | -104.832 | 10 | 5.7 | 153 |
| 11/20/06 | 14:38:28 | -17.664 | -70.228 | 39 | 5.8 | 162 |
| 11/30/06 | 11:33:17 | -21.297 | -174.677 | 14 | 5.7 | 154 |
| 11/30/06 | 23:38:13 | -29.761 | -111.958 | 10 | 5.6 | 132 |
| 12/3/06 | 20:52:16 | 13.994 | -91.207 | 61 | 5.8 | 142 |
| 12/7/06 | 5:20:54 | 47.112 | -27.301 | 10 | 4.8 | 113 |
| 12/7/06 | 19:10:22 | 46.153 | 154.386 | 16 | 6.3 | 172 |
| 12/15/06 | 23:57:10 | -35.327 | -105.745 | 10 | 5.8 | 106 |
| 1/5/07 | 16:52:22 | 55.755 | -156.061 | 19 | 5.5 | 102 |
| 1/7/07 | 1:50:54 | 61.906 | 1.171 | 10 | 4.7 | 117 |
| 1/8/07 | 20:52:21 | -18.58 | -177.847 | 407 | 5.6 | 185 |
| 1/13/07 | 9:18:32 | 45.567 | 153.765 | 10 | 5.8 | 175 |
| 1/15/07 | 18:17:59 | 34.892 | 138.64 | 170 | 5.7 | 183 |
| 1/15/07 | 21:19:40 | -4.609 | -105.145 | 10 | 5.6 | 146 |
| 1/18/07 | 22:32:36 | 22.331 | -45.086 | 10 | 5 | 107 |
| 1/30/07 | 21:37:46 | 20.985 | 144.696 | 30 | 6.3 | 190 |
| 1/31/07 | 3:15:52 | -29.776 | -178.002 | 34 | 6.1 | 188 |
| 2/4/07 | 3:33:19 | 35.344 | -35.944 | 10 | 5.6 | 144 |
| 2/4/07 | 20:56:59 | 19.372 | -78.518 | 10 | 5.7 | 180 |
| 2/5/07 | 10:16:24 | -20.678 | -175.487 | 15 | 5.6 | 196 |
| 2/8/07 | 16:28:08 | 8.596 | -39.433 | 10 | 5.3 | 153 |
| 2/12/07 | 10:35:21 | 35.796 | -10.334 | 10 | 6.2 | 190 |
| 2/14/07 | 1:29:07 | -29.59 | -112.051 | 10 | 5.6 | 166 |
| 2/17/07 | 0:02:57 | 41.794 | 143.553 | 31 | 5.9 | 186 |
| 2/18/07 | 21:37:45 | 6.336 | -82.706 | 26 | 5.5 | 177 |
| 3/1/07 | 23:11:52 | 26.581 | -44.594 | 10 | 5.5 | 168 |
| 3/2/07 | 13:07:31 | -30.882 | -71.193 | 48 | 5.6 | 191 |
| 3/4/07 | 22:39:24 | 34.491 | -36.903 | 10 | 5.2 | 170 |
| 3/8/07 | 5:03:32 | 29.908 | 140.204 | 140 | 5.9 | 190 |
| 3/10/07 | 17:03:38 | 74.256 | 8.713 | 10 | 5.7 | 179 |
| 3/11/07 | 7:09:26 | 43.988 | 147.891 | 49 | 6 | 191 |
| 3/18/07 | 2:11:05 | 4.585 | -78.502 | 8 | 6.4 | 197 |
| 3/21/07 | 23:07:46 | 15.185 | -45.617 | 10 | 5.2 | 94 |
| 3/24/07 | 19:13:51 | -19.722 | -70.142 | 30 | 5.8 | 170 |
| 3/25/07 | 0:40:02 | -20.617 | 169.357 | 34 | 6.5 | 190 |
| 3/26/07 | 7:27:56 | 22.036 | 142.975 | 10 | 5.5 | 175 |
| 3/30/07 | 15:58:44 | -14.624 | 177.766 | 10 | 5.7 | 178 |
| 4/2/07 | 12:02:23 | -8.706 | 157.62 | 14 | 6 | 192 |
| 4/4/07 | 0:39:44 | -7.141 | 156.047 | 10 | 5.9 | 180 |
| 4/4/07 | 11:00:27 | -20.711 | 168.828 | 10 | 5.8 | 196 |
| 4/5/07 | 3:56:50 | 37.306 | -24.621 | 14 | 6.1 | 191 |
| 4/7/07 | 7:09:25 | 37.306 | -24.494 | 8 | 5.9 | 187 |
| 4/9/07 | 10:18:05 | 48.304 | 154.695 | 36 | 5.8 | 168 |
| 4/13/07 | 18:24:19 | -35.051 | -108.836 | 10 | 5.7 | 177 |
| 4/20/07 | 1:45:56 | 25.71 | 125.108 | 9 | 5.9 | 183 |
| 4/21/07 | 7:12:48 | -3.548 | 151.266 | 407 | 5.8 | 192 |
| 4/24/07 | 16:07:40 | 28.985 | -43.208 | 10 | 5.3 | 158 |
| 4/25/07 | 2:11:55 | 47.164 | -27.457 | 10 | 5 | 111 |
| 4/29/07 | 12:41:57 | 52.007 | -179.972 | 117 | 6.2 | 188 |
| 5/6/07 | 4:47:14 | 6.705 | -72.946 | 160 | 5.4 | 132 |
| 5/6/07 | 22:01:09 | -19.406 | -179.315 | 688 | 5.5 | 190 |
| 5/17/07 | 19:29:10 | -30.658 | -178.202 | 41 | 5.5 | 178 |
| 5/23/07 | 4:41:47 | 52.352 | -31.814 | 10 | 5.6 | 188 |
| 5/25/07 | 17:47:31 | -24.222 | -67.027 | 181 | 5.5 | 186 |
| 5/26/07 | 2:44:47 | -35.928 | -103.097 | 10 | 5.5 | 161 |
| 5/30/07 | 20:22:13 | 52.137 | 157.293 | 116 | 6.4 | 186 |
| 6/13/07 | 19:29:40 | 13.554 | -90.618 | 23 | 5.9 | 186 |
| 6/14/07 | 13:37:41 | -36.208 | -100.152 | 10 | 5.9 | 168 |
| 6/28/07 | 8:44:49 | -15.686 | -74.89 | 27 | 5.5 | 179 |
| 6/28/07 | 19:25:21 | -32.004 | -71.34 | 69 | 5.5 | 184 |
| 6/29/07 | 5:56:02 | 44.442 | -28.21 | 10 | 4.6 | 129 |
| 7/3/07 | 8:26:01 | 0.715 | -30.272 | 10 | 5.8 | 165 |
| 7/6/07 | 17:40:50 | -16.418 | -172.644 | 10 | 5.5 | 182 |
| 7/12/07 | 5:23:49 | -7.933 | -74.379 | 152 | 5.9 | 193 |
| 7/15/07 | 9:27:34 | -15.383 | 168.597 | 8 | 6 | 196 |
| 7/15/07 | 13:08:01 | 52.479 | -168.047 | 10 | 5.8 | 196 |
| 7/16/07 | 1:13:22 | 37.535 | 138.446 | 12 | 6.5 | 194 |
| 7/16/07 | 14:17:37 | 36.808 | 134.85 | 350 | 6.2 | 196 |
| 7/16/07 | 22:58:23 | 7.182 | -72.126 | 30 | 5.5 | 184 |
| 7/17/07 | 9:39:28 | -26.206 | -177.744 | 10 | 5.7 | 196 |
| 7/18/07 | 0:07:35 | -26.295 | -177.738 | 10 | 5.8 | 196 |
| 7/21/07 | 13:27:04 | -8.133 | -71.272 | 645 | 6.2 | 166 |
| 7/21/07 | 15:34:53 | -22.151 | -65.777 | 290 | 5.8 | 196 |
| 7/23/07 | 6:03:52 | -3.942 | -104.029 | 10 | 5.6 | 167 |
| 7/23/07 | 22:30:08 | 14.381 | -90.954 | 113 | 5.5 | 194 |
| 7/27/07 | 14:46:27 | -21.459 | 170.939 | 10 | 6 | 187 |
| 7/30/07 | 6:06:50 | -35.519 | -103.846 | 10 | 5.5 | 140 |
| 7/31/07 | 15:07:35 | 27.343 | 126.897 | 10 | 5.5 | 173 |
| 8/2/07 | 15:11:43 | -21.555 | -179.361 | 618 | 5.6 | 188 |
| 8/4/07 | 14:24:52 | -4.797 | -105.406 | 10 | 5.7 | 178 |
| 8/5/07 | 9:28:40 | -19.153 | 168.716 | 45 | 5.6 | 195 |
| 8/9/07 | 17:25:05 | 25.918 | -45.001 | 10 | 5.6 | 161 |
| 8/12/07 | 12:05:20 | -11.378 | 166.273 | 42 | 5.8 | 194 |
| 8/14/07 | 5:38:06 | 19.346 | -155.066 | 10 | 5.6 | 188 |
| 8/15/07 | 23:40:58 | -13.386 | -76.603 | 39 | 6.7 | 196 |
| 8/16/07 | 4:03:04 | 50.243 | -177.568 | 15 | 5.8 | 196 |
| 8/16/07 | 8:39:28 | -9.83 | 159.467 | 10 | 6.1 | 196 |
| 8/18/07 | 2:37:05 | 40.027 | -29.754 | 10 | 4.8 | 136 |
| 8/18/07 | 2:52:35 | -13.805 | -76.291 | 30 | 6 | 198 |
| 8/19/07 | 1:22:41 | -13.627 | -76.616 | 26 | 5.9 | 196 |
| 8/20/07 | 21:01:28 | -19.715 | -66.451 | 222 | 5.3 | 175 |
| 8/20/07 | 22:42:29 | 8.038 | -39.248 | 10 | 6.3 | 190 |
| 8/22/07 | 7:26:24 | 42.02 | 140.638 | 124 | 5.4 | 167 |
| 8/26/07 | 12:37:31 | -17.457 | -174.335 | 127 | 5.9 | 199 |
